# Supplementary material
Source: PubMed Central journal article supplement (PMC6396173)
Supplement: blood862151-suppl1.pdf [file blood862151-suppl1.pdf]

## **Supplemental material**

***CCND2* and *CCND3* hijack immunoglobulin light chain enhancers in  
cyclin D1-negative mantle cell lymphoma**

David Martín-García, Alba Navarro *et al.*

**SUPPLEMENTAL TABLES.....3**

Supplemental Table S1. Commercial and BAC-labelbes used for FISH analyses. .... 3  
Supplemental Table S2. NGS and CN array techniques applied to each sample..... 4  
Supplemental Table S3. Primers used for verification of IG and *CCND3* breakpoints ..... 6  
Supplemental Table S4. TaqMan assays used for qPCR analyses..... 7  
Supplemental Table S5. FISH and gene expression results in the 56 cyclin D1<sup>-</sup> MCL ..... 8  
Supplemental Table S6. Interchromosomal SVs detected in 3 cyclin D1<sup>-</sup> MCL ..... 10  
Supplemental Table S7. SVs detected by WGS in case ID73..... 11  
Supplemental Table S8. Protein-coding mutations in case ID73 ..... 13  
Supplemental Table S9. Copy number alterations of cyclin D1<sup>-</sup> MCL..... 14

**SUPPLEMENTAL FIGURES..... 15**

Supplemental Figure S1. Schematic representation of the experimental design..... 15  
Supplemental Figure S2. FISH analyses of *CCND2/D3* cryptic insertions ..... 16  
Supplemental Figure S3. *CCNE1/E2* expression in MCL, DLBCL, and SMZL ..... 17  
Supplemental Figure S4. Gene expression profiling in cyclin D1<sup>-</sup> MCL..... 17  
Supplemental Figure S5. Copy number alterations in cyclin D1<sup>-</sup> MCL..... 20  
Supplemental Figure S6. Clinical outcome of cyclin D1<sup>-</sup> MCL patients ..... 21

**SUPPLEMENTAL REFERENCES .....22**

SUPPLEMENTAL TABLES

Supplemental Table S1. Commercial and bacterial artificial chromosomes (BAC)-labeled probes used for FISH analyses.

| BAC/Probe             | Region               | Chrom. location (hg19)  | Reference        | Fluorescent dye       |
|-----------------------|----------------------|-------------------------|------------------|-----------------------|
| <b>CCND2 BAP-1*</b>   |                      |                         |                  |                       |
| RP11-578L13           | 5'                   | chr12:4002511-4203622   | 1,2              | Spectrum Orange       |
| RP11-388F6            | 3'                   | chr12:4443393-4613592   | 1,2              | Spectrum Green        |
| <b>CCND2 BAP-2*</b>   |                      |                         |                  |                       |
| RP11-358F19           | 5'                   | chr12:3991712-4180381   | Unpublished      | Spectrum Red          |
| RP11-8E02             | 3'                   | chr12:4434027-4604218   | Unpublished      | Spectrum Green        |
| <b>CCND3 BAP</b>      |                      |                         |                  |                       |
| RP1-321B9             | 5'                   | chr6:42159875-42243431  | 3                | Spectrum Orange       |
| RP1-139D8             | 5'                   | chr6:41992892-42159974  | 3                | Spectrum Orange       |
| RP5-973N23            | 3'                   | chr6:41694188-41810693  | 3                | Spectrum Green        |
| RP11-298J23           | 3'                   | chr6:41564073-41743535  | 3                | Spectrum Green        |
| <b>CCNE1 BAP</b>      |                      |                         |                  |                       |
| RP11-17N20            | 3'                   | chr19:30370277-30526346 | Unpublished      | Spectrum Red          |
| CTD-2063E21           | 5'                   | chr19:30097638-30224016 | -                | Spectrum Green        |
| LSI IGH BAP           |                      | 14q32.3                 | Abbott Molecular | Spectrum Green/Orange |
| XL IGL BAP            |                      | 22q11.22                | Metasystems      | Spectrum Green/Orange |
| XL IGK BAP            |                      | 2p11.2                  | Metasystems      | Spectrum Green/Orange |
| <b>Locus specific</b> |                      |                         |                  |                       |
| RP11-928N17           | CCND2                | chr12:4274557-4482113   | -                | Spectrum Red          |
| CTD-3053I1            | CCND3                | chr6:41751478-41951375  | -                | Spectrum Red          |
| RP11-104J24           | CCNE1                | chr19:30250326-30400791 | -                | Spectrum Red          |
| RP11-272K10           | CCNE2                | chr8:95874697-96025074  | -                | Spectrum Red          |
| RP11-1134E24          | IGK-enh <sup>#</sup> | chr2:89135166-89284041  | -                | Spectrum Green        |
| RP11-15J7             | IGK-enh <sup>#</sup> | chr2:89140332-89302455  | -                | Spectrum Green        |
| XCE 8                 | cen                  | Centromere chr8         | Metasystems      | Spectrum Orange       |

BAP: break-apart probe, cen: centromere, enh: enhancer.

\*The design of both CCND2 BAP probes was virtually the same, only the BACs selected were different.

<sup>#</sup>The BACs used do not cover exclusively the enhancer region of IGK.

**Supplemental Table S2. Next-generation sequencing and molecular techniques applied to each sample.**

| Case   | DNA origin | MP-WGS | WGS | WES | Sanger | FISH | CN array   | GEP | qPCR | IGHV identity/<br>V-gene |
|--------|------------|--------|-----|-----|--------|------|------------|-----|------|--------------------------|
| ID3_1  | FT         | X      |     | X   | X      | X    | SNP-500K   | X   |      | 95.85%<br>IGHV3-48       |
| ID3_2  | FFPE       |        |     |     |        | X    | OncoScan   |     |      |                          |
| ID5    | FT         |        |     | X   | X      | X    | SNP-500K   | X   |      | 97.11%<br>IGHV4-39       |
| ID6    | FT         | X      |     | X   | X      | X    | SNP-500K   | X   |      |                          |
| ID7    | FFPE       |        |     |     |        | X    |            |     |      |                          |
| ID9    | FFPE       |        |     |     |        | X    | Agilent 1M | X   | X    |                          |
| ID10   | FFPE       |        |     |     |        | X    |            |     | X    |                          |
| ID12_1 | FFPE       |        |     |     |        | X    | Agilent 1M |     | X    | 100%<br>IGHV3-21         |
| ID12_2 | FFPE       |        |     |     |        | X    | Agilent 1M | X   | X    |                          |
| ID13   | FFPE       |        |     |     |        | X    | Agilent 1M |     |      |                          |
| ID14   | FFPE       |        |     |     |        | X    | Agilent 1M | X   | X    |                          |
| ID15   | FFPE       |        |     |     |        | X    | Agilent 1M |     |      |                          |
| ID16   | FFPE       |        |     |     |        | X    | Agilent 1M |     |      |                          |
| ID17   | FFPE       |        |     |     |        | X    | Agilent 1M |     | X    |                          |
| ID18   | FFPE       |        |     |     |        | X    | Agilent 1M |     |      | 97.21%<br>IGHV4-34       |
| ID24   | FFPE       |        |     |     |        | X    |            |     | X    | 99.59%<br>IGHV1-3        |
| ID26   | FFPE       |        |     |     |        | X    | Agilent 1M | X   | X    | 99.15%<br>IGHV3-74       |
| ID28   | FFPE       |        |     |     |        | X    | Agilent 1M | X   | X    | 100%<br>IGHV1-8          |
| ID29   | FFPE       |        |     |     |        | X    | Agilent 1M |     | X    |                          |
| ID31   | FFPE       |        |     |     |        | X    | Agilent 1M |     | X    |                          |
| ID32   | FFPE       |        |     |     |        | X    | Agilent 1M |     |      |                          |
| ID34   | FFPE       |        |     |     |        | X    | Agilent 1M | X   | X    |                          |
| ID35   | FFPE       |        |     |     |        | X    | Agilent 1M |     | X    |                          |
| ID36   | FFPE       |        |     |     |        | X    | Agilent 1M |     |      |                          |
| ID37   | FFPE       |        |     |     |        | X    | Agilent 1M |     |      | 97.17%<br>IGHV4-39       |
| ID39   | FFPE       |        |     |     |        | X    | Agilent 1M | X   | X    | 97.44%<br>IGHV3-48       |
| ID40   | FFPE       |        |     |     |        | X    | Agilent 1M | X   | X    | 98.74%<br>IGHV3-9        |
| ID42   | FFPE       |        |     |     |        | X    | Agilent 1M |     |      |                          |
| ID43   | FFPE       |        |     |     |        | X    |            |     | X    |                          |
| ID44   | FFPE       |        |     |     |        | X    | OncoScan   |     | X    |                          |
| ID55   | FFPE       |        |     |     |        | X    | Agilent 1M | X   | X    |                          |
| ID56   | FFPE       |        |     |     |        | X    | Agilent 1M | X   | X    |                          |
| ID59   | FFPE       |        |     |     |        | X    | Agilent 1M | X   | X    | 95.07%<br>IGHV4-69       |
| ID60   | FFPE       |        |     |     |        | X    | Agilent 1M | X   | X    | 95.93%<br>IGHV4-34       |
| ID61   | FFPE       |        |     |     |        | X    | Agilent 1M | X   | X    |                          |
| ID62   | FFPE       |        |     |     |        | X    |            |     |      |                          |
| ID64   | FFPE       |        |     |     |        | X    |            |     |      |                          |

| Case   | DNA origin | MP-WGS | WGS | WES | Sanger | FISH | CN array   | GEP | qPCR | IGHV identity/<br>V-gene |
|--------|------------|--------|-----|-----|--------|------|------------|-----|------|--------------------------|
| ID65_1 | FFPE       |        |     |     |        | X    | Agilent 1M | X   | X    | 99.60%<br>IGHV3-21       |
| ID65_2 | FFPE       |        |     |     |        | X    | Agilent 1M |     |      |                          |
| ID66_1 | FFPE       |        |     |     |        | X    | Agilent 1M |     |      |                          |
| ID66_2 | FT         |        |     |     |        | X    | SNP- 6.0   |     |      |                          |
| ID67   | FFPE       |        |     |     |        | X    | Agilent 1M |     | X    | 96.39%<br>IGHV3-23       |
| ID68   | FFPE       |        |     |     |        | X    |            |     | X    | 99.19%<br>IGHV3-30       |
| ID70   | FFPE       |        |     |     |        | X    | Agilent 1M |     | X    |                          |
| ID73_1 | FT         |        |     |     |        | X    | SNP- 6.0   |     |      | 97.58%<br>IGHV3-21       |
| ID73_2 | FT         | X      | X   |     |        | X    | SNP- 6.0   |     | X    |                          |
| ID75   | FFPE       |        |     |     |        | X    | OncoScan   |     |      |                          |
| ID76   | FT         | X      |     |     |        | X    | SNP- 6.0   |     | X    |                          |
| ID77   | FFPE       |        |     |     |        | X    | OncoScan   |     | X    |                          |
| ID79   | FFPE       |        |     |     |        | X    |            |     |      |                          |
| ID80   | FFPE       |        |     |     |        | X    |            |     |      |                          |
| ID83   | FFPE       |        |     |     |        | X    | OncoScan   |     | X    |                          |
| ID84   | FFPE       |        |     |     |        | X    |            |     | X    | 99.60%<br>IGHV3-21       |
| ID85   | FFPE       |        |     |     |        | X    |            |     | X    | 100%<br>IGHV4-34         |
| ID86   | FFPE       |        |     |     |        | X    | OncoScan   |     | X    |                          |
| ID87   | FFPE       |        |     |     |        | X    | OncoScan   |     | X    |                          |
| ID88   | FFPE       |        |     |     |        | X    |            |     | X    |                          |
| ID90   | FFPE       |        |     |     |        | X    | OncoScan   |     | X    | 100%<br>IGHV3-21         |
| ID91   | FFPE       |        |     |     |        | X    |            |     | X    | 99.20%<br>IGHV3-21       |
| ID92   | FFPE       |        |     |     |        | X    | OncoScan   |     | X    | 100%<br>IGHV4-59         |
| ID93   | FFPE       |        |     |     |        | X    |            |     | X    | 95.65%<br>IGHV1-3        |

CN: copy number, FT: frozen tissue, FFPE: formalin-fixed paraffin embedded tissue, GEP: gene expression profile, IGHV: immunoMP-WGS: mate-pair whole-genome sequencing, WES: whole-exome sequencing, WGS: whole genome sequencing, qPCR: quantitative PCR.

**Supplemental Table S3. Primers used for verification of IG and *CCND3* breakpoints by Sanger sequencing.**

| <b>Primer name</b> | <b>Data</b> | <b>Sequence (5'- 3')</b> |
|--------------------|-------------|--------------------------|
| <b>ID3v2_tel_F</b> | MP-WGS      | AATTGCATTGGCTCATTCT      |
| <b>ID3v2_tel_R</b> | MP-WGS      | CCTCCCTTGAATTGTCCAATAA   |
| <b>ID3_cen_F</b>   | MP-WGS      | AGATCAGCTGGGGTAAACGA     |
| <b>ID3_cen_R</b>   | MP-WGS      | AATTCCAGCCTCCCTTCATT     |
| <b>ID6-F</b>       | WES         | TACTGGCCATCAGACCCAAA     |
| <b>ID6-R</b>       | WES         | CCAAGAACCGAAGACAGCTC     |
| <b>ID5-left*</b>   | WES         | CGGTCTTGGGACATTCAGAAA    |
| <b>ID5-right</b>   | WES         | GGAGGCGTCAAGATCCACTA     |

cen: centromeric break, F: forward, MP-WGS: mate-pair whole-genome sequencing, R: reverse, tel: telomeric break, WES: whole-exome sequencing.

\*This primer includes the breakpoint.

**Supplemental Table S4. TaqMan assays (Thermo Fisher Scientific Inc.) used for quantitative PCR analyses.**

| <b>Gene Symbol</b> | <b>Assay ID</b> | <b>Amplicon size (base pairs)</b> | <b>Reference sequence</b> |
|--------------------|-----------------|-----------------------------------|---------------------------|
| <i>CCND2</i>       | Hs_00153380_m1  | 69                                | MN_001759.3               |
| <i>CCND3</i>       | Hs_00236949_m1  | 67                                | MN_01136017.3             |
| <i>CCNE1</i>       | Hs_01026536_m1  | 64                                | MN_001322262.1            |
| <i>CCNE2</i>       | Hs_00180319_m1  | 92                                | MN_057749.2               |
| <i>GUSB</i>        | Hs_00939627_m1  | 96                                | MN_001293104.1            |

**Supplemental Table S5. Complete FISH and gene expression results of *CCND2/D3*, *CCNE1/E2*, and IG genes of the 56 cyclin D1<sup>+</sup> MCL.**

| ID   | Group | Transl. Status | <i>CCND2</i> BAP | <i>CCND3</i> BAP | <i>CCNE1</i> #      | <i>CCNE2</i> #   | IGH BAP | IGK BAP | IGL BAP | IGK- <i>CCND2</i> cryptic ins. | IGK- <i>CCND3</i> cryptic ins. | NGS/Sanger    |
|------|-------|----------------|------------------|------------------|---------------------|------------------|---------|---------|---------|--------------------------------|--------------------------------|---------------|
| ID3  | D3    | D3-K           | neg              | neg              |                     |                  | neg     | neg     | neg     |                                | pos                            | MP-WGS/Sanger |
| ID5  | D3    | D3-L           | neg              | neg              |                     |                  | neg     | neg     | neg     |                                |                                | WES/Sanger    |
| ID6  | D3    | D3-K           | neg              | neg              |                     |                  | neg     | neg     | neg     |                                | pos                            | MP-WGS/Sanger |
| ID7  | D2    | D2-K           | pos              |                  |                     |                  | neg     | pos     | neg     |                                |                                |               |
| ID9  | D3    | D3-K           | neg              | neg              |                     |                  | neg     | neg     | neg     |                                | pos                            |               |
| ID10 | D2    | D2-K           | pos              | neg              |                     |                  | neg     | pos     | neg     |                                |                                |               |
| ID12 | D2    | D2-K           | neg              | neg              |                     |                  |         | neg     | neg     | pos                            |                                |               |
| ID13 | D2    | D2-K           | pos              | neg              |                     |                  | neg     | pos     |         |                                |                                |               |
| ID14 | D2    | D2 -H          | pos              |                  |                     |                  | pos     |         |         |                                |                                |               |
| ID15 | D2    | D2-K           | pos              |                  |                     |                  |         | pos     |         |                                |                                |               |
| ID16 | D2    | D2-break       | pos              |                  |                     |                  | neg     | neg     | n.e.    |                                |                                |               |
| ID17 | D2    | D2-K           | pos              |                  |                     |                  | neg     | pos     |         |                                |                                |               |
| ID18 | D2    | D2-K           | pos              | neg              |                     |                  | neg     | pos     | neg     |                                |                                |               |
| ID24 | D2    | D2-H           | pos              | neg              |                     |                  | pos     | neg     | neg     |                                |                                |               |
| ID26 | E1/E2 | neg            | neg              | neg              | BAP neg<br>IGKe neg | IGKe neg         | neg     | neg     | neg     |                                |                                |               |
| ID28 | D2    | D2-K           | pos              |                  |                     |                  | neg     | pos     | neg     |                                |                                |               |
| ID29 | D2    | D2-break       | pos              |                  |                     |                  | neg     | neg     | neg     |                                |                                |               |
| ID31 | D2    | D2-break       | pos              | neg              |                     |                  | neg     | neg     | neg     |                                |                                |               |
| ID32 | D2    | D2-K           | pos              |                  |                     |                  |         | pos     |         |                                |                                |               |
| ID34 | D2    | D2-break       | pos              | neg              |                     |                  |         |         |         |                                |                                |               |
| ID35 | D2    | D2-L           | pos              |                  |                     |                  | neg     | neg     | pos     |                                |                                |               |
| ID36 | D2    | D2-L           | pos              |                  |                     |                  | neg     | neg     | pos     |                                |                                |               |
| ID37 | D2    | D2-L           | pos              |                  |                     |                  | neg     | neg     | pos     |                                |                                |               |
| ID39 | D2    | D2-L           | pos              |                  |                     |                  | neg     | neg     | pos     |                                |                                |               |
| ID40 | D2    | D2-K           | pos              |                  |                     |                  | neg     | pos     | neg     |                                |                                |               |
| ID42 | D2    | D2-L           | pos              |                  |                     |                  |         |         | pos     |                                |                                |               |
| ID43 | D2    | D2-H           | pos              |                  |                     |                  | pos     | neg     |         |                                |                                |               |
| ID44 | D2    | D2-K           | pos <sup>†</sup> |                  |                     |                  |         | pos     |         |                                |                                |               |
| ID55 | D2    | D2-break       | pos <sup>†</sup> |                  |                     |                  | n.e.    | neg     | neg     |                                |                                |               |
| ID56 | D2    | D2-K           | neg              | n.e.             |                     |                  | neg     | neg     |         | pos                            |                                |               |
| ID59 | D2    | D2-break       | pos              |                  |                     |                  | neg     | neg     |         |                                |                                |               |
| ID60 | E1/E2 | neg            | neg              | n.e.             | BAP neg<br>IGKe neg | IGKe n.e.        | neg     | neg     | neg     |                                |                                |               |
| ID61 | D2    | D2-K           | pos              |                  |                     |                  | neg     | pos     | neg     |                                |                                |               |
| ID62 | D2    | D2-H*          | pos              |                  |                     |                  |         |         |         |                                |                                |               |
| ID64 | D2    | D2-break       | pos              |                  |                     |                  | neg     |         |         |                                |                                |               |
| ID65 | D2    | D2-K           | neg <sup>†</sup> | neg              |                     |                  | neg     | neg     | neg     | pos                            |                                |               |
| ID66 | D2    | D2-K           | pos              |                  |                     |                  |         | pos     |         |                                |                                |               |
| ID67 | D2    | D2-K           | pos              |                  |                     |                  |         | pos     |         |                                |                                |               |
| ID68 | D2    | D2-K           | neg              | n.e.             |                     |                  |         |         |         | pos                            |                                |               |
| ID70 | D3    | D3-K           | neg <sup>†</sup> | neg              |                     |                  | neg     | neg     | neg     |                                | pos                            |               |
| ID73 | E1/E2 | neg            | neg              | neg              | BAP n.e.            | neg <sup>†</sup> |         |         | n.e.    |                                |                                |               |
| ID75 | D2    | D2-K           | pos              |                  |                     |                  |         | pos     |         |                                |                                |               |
| ID76 | D2    | D2-K*          | pos              |                  |                     |                  |         |         |         |                                |                                |               |
| ID77 | E1/E2 | neg            | neg              | n.e.             | BAP neg<br>IGKe neg | IGKe n.e.        |         |         |         |                                |                                |               |
| ID79 | D2    | D2-K           | pos              |                  |                     |                  | neg     | pos     | neg     |                                |                                |               |
| ID80 | D2    | D2-K           | pos              |                  |                     |                  |         | pos     |         |                                |                                |               |
| ID83 | D2    | D2-break       | pos              |                  |                     |                  |         | neg     | n.e.    |                                |                                |               |



| ID   | Group | Transl. Status | CCND2 BAP | CCND3 BAP | CCNE1 # | CCNE2 # | IGH BAP | IGK BAP | IGL BAP | IGK-CCND2 cryptic ins. | IGK-CCND3 cryptic ins. |
|------|-------|----------------|-----------|-----------|---------|---------|---------|---------|---------|------------------------|------------------------|
| ID84 | D2    | D2-K           | pos       |           |         |         |         | pos     | neg     |                        |                        |
| ID85 | D2    | D2-K           | pos       |           |         |         | neg     | pos     |         |                        |                        |
| ID86 | D3    | D3-K           | neg       | neg       |         |         | neg     |         |         |                        | pos                    |
| ID87 | D3    | D3-K           | neg       | neg†      |         |         | neg     |         |         |                        | pos†                   |
| ID88 | D2    | D2-K           | pos       |           |         |         |         | pos     |         |                        |                        |
| ID90 | D3    | D3-K           | neg       | neg       |         |         |         |         |         |                        | pos                    |
| ID91 | D2    | D2-break       | pos       |           |         |         |         | neg     | n.e.    |                        |                        |
| ID92 | D3    | D3-K           | neg       | neg       |         |         |         |         |         |                        | pos                    |
| ID93 | D2    | D2-K           | pos       |           |         |         |         | pos     |         |                        |                        |

Amp: amplification, BAP: break-apart probe, D2: MCL with *CCND2* rearrangement and overexpression, D3: MCL with *CCND3* rearrangement and overexpression, D2-break: *CCND2* break with unknown partner, E1/E2: MCL with *CCNE1* and *CCNE2* concomitant overexpression, GEP: gene expression profiling, IGKe: IGK enhancer, ins: insertion, neg: negative, n.e.: non-evaluable, pos: positive, transl: translocation.

\*Positive for *CCND2/IGH* or *IGK/CCND2* by FISH with locus specific probes and/or by karyotype.

#The different hybridizations performed with *CCNE1* or *CCNE2* probes are detailed for the 4 cases, including FISH with *CCNE2* break and FISH using the combination of IGK-enhancer (IGKe) with *CCNE1* or *CCNE2*.

†Gain of the locus detected by FISH.

**Supplemental Table S6. Interchromosomal structural variants detected by mate-pair WGS analysis in 3 cyclin D1<sup>+</sup> MCL cases (hg19).**

| Case | Ch<br>r1 | Position<br>1 | Position<br>1b | Chr<br>2 | Position<br>2 | Position<br>2b | CNA<br>1 | CNA<br>2 | Primary<br>SV |
|------|----------|---------------|----------------|----------|---------------|----------------|----------|----------|---------------|
| ID3  | 2        | 89130000      | 89140000       | 6        | 41960000      | 41970000       |          |          | IGK/CCND3     |
| ID3  | 3        | 154520000     | 154540000      | 6        | 107500000     | 107540000      | Yes      | Yes      |               |
| ID3  | 6        | 114510000     | 114520000      | 9        | 3700000       | 3710000        | Yes      | Yes      |               |
| ID3  | 6        | 124310000     | 124320000      | 9        | 112440000     | 112450000      | Yes      | Yes      |               |
| ID6  | 1        | 33510000      | 33520000       | 7        | 24450000      | 24460000       |          |          |               |
| ID6  | 1        | 160860000     | 160870000      | 4        | 112598000     | 112600000      |          |          |               |
| ID6  | 2        | 89150000      | 89160000       | 6        | 41920000      | 41930000       |          |          | IGK/CCND3     |
| ID6  | 5        | 43080000      | 43090000       | 7        | 80530000      | 80540000       |          |          |               |
| ID6  | 6        | 7310000       | 7320000        | 13       | 51620000      | 51640000       |          |          |               |
| ID6  | 6        | 51840000      | 51850000       | 10       | 92244400      | 92253000       |          |          |               |
| ID76 | 1        | 106680000     | 106690000      | 13       | 91408684      | 91418684       |          |          |               |
| ID76 | 1        | 106670000     | 106680000      | 13       | 91414411      | 91424411       |          |          |               |
| ID76 | 2        | 89150000      | 89160000       | 12       | 4342915       | 4352915        |          |          | IGK/CCND2     |
| ID76 | 2        | 89180000      | 89190000       | 12       | 4333595       | 4343595        |          |          | IGK/CCND2     |
| ID76 | 2        | 29980000      | 29990000       | 10       | 48415075      | 48425075       |          |          |               |
| ID76 | 3        | 123930000     | 123940000      | 13       | 92051732      | 92061732       | Yes      | Yes      |               |
| ID76 | 3        | 124220000     | 124230000      | 13       | 91192485      | 91202485       |          |          |               |
| ID76 | 3        | 124200000     | 124210000      | 13       | 91300059      | 91310059       |          |          |               |
| ID76 | 3        | 133550000     | 133560000      | 13       | 58884223      | 58894223       |          | Yes      |               |
| ID76 | 3        | 124320000     | 124330000      | 13       | 91258208      | 91268208       |          |          |               |
| ID76 | 3        | 124520000     | 124530000      | 13       | 80886856      | 80896856       | Yes      | Yes      |               |
| ID76 | 5        | 430000        | 440000         | 11       | 63714793      | 63724793       |          |          |               |
| ID76 | 5        | 420000        | 430000         | 11       | 63717789      | 63727789       |          |          |               |
| ID76 | 9        | 105810000     | 105820000      | 15       | 100910062     | 100920062      | Yes      | Yes      |               |
| ID76 | 10       | 48410000      | 48420000       | 2        | 29983938      | 29993938       |          |          |               |
| ID76 | 11       | 63720000      | 63730000       | 5        | 424856        | 434856         |          |          |               |
| ID76 | 13       | 80890000      | 80900000       | 3        | 124525613     | 124535613      | Yes      | Yes      |               |
| ID76 | 13       | 90870000      | 90880000       | 3        | 124620979     | 124630979      | Yes      | Yes      |               |
| ID76 | 13       | 91260000      | 91270000       | 3        | 124318783     | 124328783      |          |          |               |
| ID76 | 13       | 91300000      | 91310000       | 3        | 124197467     | 124207467      |          |          |               |
| ID76 | 13       | 58880000      | 58890000       | 3        | 133549364     | 133559364      | Yes      |          |               |
| ID76 | 13       | 91200000      | 91210000       | 3        | 124218054     | 124228054      |          |          |               |
| ID76 | 15       | 100910000     | 100920000      | 9        | 105806865     | 105816865      | Yes      | Yes      |               |

Chr 1, Chr 2: the 2 chromosomes involved in the rearrangement, CNA 1, CNA 2: copy number alterations present in the breakpoint 1 and 2, respectively, Pos 1, Pos 1b: interval of the breakpoint in the first (Chr 1), Pos 2, Pos 2b: interval of the breakpoint in the second chromosome involved in the structural variant (Chr 2).

**Supplemental Table S7. Structural variants detected by WGS (mate-pair and paired-end) in the cyclin D1<sup>+</sup> and cyclin D2<sup>-</sup> MCL case ID73 (hg19).**

| Chr 1 | Position 1             | Chr 2 | Position 2             | Library | Algorithm* | Type  | CNA 1 | CNA 2 | Affected genes         |
|-------|------------------------|-------|------------------------|---------|------------|-------|-------|-------|------------------------|
| chr2  | 32605430               | chr2  | 32460793               | PE      | S          | Intra |       |       | <i>BIRC6-NLRC4</i>     |
| chr2  | 78796419               | chr2  | 78799187               | PE      | S          | Intra |       |       |                        |
| chr2  | 85242613               | chr12 | 32610437               | PE      | S          | Inter |       |       | <i>KCMF1-FGD4</i>      |
| chr2  | 85242658               | chr9  | 123193506              | PE-MP   | S-H        | Inter |       |       | <i>KCMF1-CDK5RAP2</i>  |
| chr2  | 111623747              | chr16 | 89636965               | PE-MP   | L-H        | Inter |       |       | <i>ACOXL-</i>          |
| chr2  | 111875807              | chr2  | 112004073              | PE      | S          | Intra |       |       | <i>-MIR4435-1HG</i>    |
| chr2  | 111920331              | chr16 | 89637012               | PE-MP   | S-L-H      | Inter |       |       | <i>BCL2L1-</i>         |
| chr2  |                        | chr2  | 231315686              | PE      | L          | Intra |       |       | <i>SP100</i>           |
| chr3  | 22471929               | chr6  | 145300900              | PE      | S-L        | Inter | Yes   | Yes   |                        |
| chr3  | 24278915               | chr6  | 157176493              | PE      | S-L        | Inter | Yes   | Yes   | <i>THRB-ARID1B</i>     |
| chr3  | 29890000<br>29900000   | chr6  | 114870066<br>114880066 | MP      | H          | Inter |       | Yes   | <i>RBMS3-</i>          |
| chr3  | 49260945               | chr3  | 50655165               | PE      | L          | Intra | Yes   | Yes   | <i>CCDC36-MAPKAPK3</i> |
| chr3  | 105443572              | chr6  | 132820773              | PE      | S          | Inter | Yes   | Yes   | <i>CBLB-STX7</i>       |
| chr3  | 105507564              | chr6  | 125420725              | PE-MP   | S-L-H      | Inter | Yes   |       | <i>CBLB-</i>           |
| chr3  | 106852345              | chr3  | 106924776              | PE      | S          | Intra |       |       | <i>LINC00882</i>       |
| chr3  | 106924705              | chr3  | 106852236              | PE      | S          | Intra |       |       | <i>LINC00882</i>       |
| chr3  | 122462393              | chr6  | 156403077              | PE-MP   | S-L-H      | Inter |       | Yes   | <i>HSPBAP1-</i>        |
| chr3  | 122460000<br>122470000 | chr6  | 135536311<br>135546311 | MP      | H          | Inter |       |       | <i>HSPBAP1-</i>        |
| chr3  | 132104159              | chr3  | 115338256              | PE      | S          | Intra |       |       |                        |
| chr3  | 187489719              | chr6  | 104184816              | PE-MP   | L-H        | Inter |       | Yes   |                        |
| chr4  | 91150655               | chr4  | 91749027               | PE      | S-L        | Intra | Yes   | Yes   | <i>CCSER1</i>          |
| chr5  | 25797188               | chr5  | 25752663               | PE      | S          | Intra |       |       |                        |
| chr6  | 127507698              | chr18 | 78014475               | PE      | L          | Inter |       | Yes   | <i>RSPO3</i>           |
| chr6  | 130869466              | chr6  | 157310615              | PE      | S-L        | Intra |       | Yes   | <i>-ARID1B</i>         |
| chr6  | 134910000<br>134920000 | chr3  | 29890453<br>29900453   | MP      | H          | Inter |       |       | <i>-RBMS3</i>          |
| chr6  | 135530000<br>135540000 | chr3  | 122460197<br>122470197 | MP      | H          | Inter |       |       | <i>MYB-HSPBAP1</i>     |
| chr6  | 136891590              | chr3  | 132104583              | PE-MP   | S-H        | Inter |       |       | <i>MAP3K5-</i>         |
| chr6  | 136960484              | chr18 | 77205507               | PE-MP   | S-L-H      | Inter |       | Yes   | <i>MAP3K5-NFATC1</i>   |
| chr6  | 141883015              | chr3  | 115335294              | PE      | S          | Inter |       |       |                        |
| chr6  | 142796723              | chr3  | 105507547              | PE      | S-L        | Inter | Yes   | Yes   | <i>-CBLB</i>           |
| chr6  | 145332773              | chr6  | 145332871              | PE      | S          | Intra | Yes   | Yes   |                        |
| chr6  | 147753309              | chr6  | 127509761              | PE      | S          | Intra |       |       | <i>-RSPO3</i>          |
| chr8  | 89690000<br>89700000   | chr18 | 48581050<br>48591050   | MP      | H          | Inter | Yes   | Yes   | <i>-SMAD4</i>          |
| chr8  | 90875850               | chr8  | 91735970               | PE      | S          | Intra | Yes   |       | <i>-TMEM64</i>         |
| chr8  | 90898425               | chr18 | 44102601               | PE      | S          | Inter | Yes   |       | <i>-LOXHD1</i>         |
| chr8  | 90920000<br>90930000   | chr18 | 44095027<br>44105027   | MP      | H          | Inter | Yes   |       | <i>OSGIN2-LOXHD1</i>   |
| chr8  | 90930000<br>90940000   | chr18 | 44092192<br>44102192   | MP      | H          | Inter | Yes   |       | <i>OSGIN2-LOXHD1</i>   |
| chr8  | 90969950               | chr8  | 91032543               | PE      | S-L        | Intra | Yes   | Yes   | <i>NBN-DECRI</i>       |
| chr8  | 91593682               | chr18 | 55055800               | PE-MP   | S-L-H      | Inter | Yes   | Yes   |                        |
| chr8  | 91742645               | chr8  | 91768347               | PE      | S-L        | Intra | Yes   | Yes   | <i>TMEM64</i>          |
| chr8  | 94917360               | chr8  | 91032535               | PE      | S          | Intra |       | Yes   | <i>PDP1-DECRI</i>      |
| chr8  | 95053197               | chr8  | 89658766               | PE      | S          | Intra | Yes   | Yes   |                        |
| chr9  | 21906122               | chr9  | 22007374               | PE      | L          | Intra | Yes   | Yes   | <i>MTAP-CDKN2B-AS1</i> |
| chr9  | 21906123               | chr9  | 21998682               | PE      | L          | Intra | Yes   | Yes   | <i>MTAP-CDKN2B-AS1</i> |
| chr9  | 21998774               | chr9  | 22007374               | PE      | L          | Intra | Yes   | Yes   | <i>CDKN2B-AS1</i>      |
| chr9  | 37810261               | chr9  | 37810213               | PE      | S          | Intra |       |       | <i>DCAF10</i>          |
| chr11 | 61841813               | chr14 | 81786774               | PE      | L          | Inter |       |       | <i>-STON2</i>          |

| Chr 1 | Position 1           | Chr 2 | Position 2           | Library | Algorithm* | Type  | CNA 1 | CNA 2 | Affected genes       |
|-------|----------------------|-------|----------------------|---------|------------|-------|-------|-------|----------------------|
| chr12 | 32610366             | chr9  | 25880494             | PE      | S          | Inter |       |       | <i>FGD4-</i>         |
| chr12 | 96340000<br>96350000 | chr2  | 50762177<br>50772177 | MP      | H          | Inter |       |       | <i>AMDHD1-NRXN1</i>  |
| chr13 | 31724986             | chr11 | 83807112             | PE-MP   | S-L-H      | Inter | Yes   |       | <i>HSPH1-DLG2</i>    |
| chr13 | 48724010             | chr13 | 48896200             | PE      | L          | Intra | Yes   | Yes   | <i>-RB1</i>          |
| chr13 | 48920363             | chr13 | 49689000             | PE      | L          | Intra | Yes   | Yes   | <i>RB1-FNDC3A</i>    |
| chr14 | 45610000<br>45620000 | chr2  | 70733462<br>70743462 | MP      | H          | Inter |       |       | <i>FANCM-TGFA</i>    |
| chr18 | 44090000<br>44100000 | chr8  | 90924821<br>90934821 | MP      | H          | Inter |       | Yes   | <i>LOXHD1-OSGIN2</i> |
| chr18 | 44102584             | chr18 | 48544346             | PE      | S-L        | Intra |       | Yes   | <i>LOXHD1-SMAD4</i>  |
| chr18 | 44141025             | chr18 | 54708286             | PE      | S          | Intra |       | Yes   | <i>LOXHD1-</i>       |
| chr18 | 48584623             | chr8  | 91025448             | PE-MP   | S-H        | Inter | Yes   | Yes   | <i>SMAD4-DECR1</i>   |
| chr18 | 55050000<br>55060000 | chr8  | 91577816<br>91587816 | MP      | H          | Inter | Yes   | Yes   |                      |
| chr18 | 77205553             | chr6  | 134906326            | PE-MP   | S-H        | Inter | Yes   |       | <i>NFATC1-</i>       |
| chr18 | 78014430             | chr6  | 130899751            | PE-MP   | S-L-H      | Inter | Yes   |       |                      |
| chr19 | 1227924              | chr19 | 1428961              | PE      | L          | Intra |       |       | <i>STK11-DAZAP1</i>  |
| chr19 | 2117444              | chr19 | 2260245              | PE      | L          | Intra |       |       | <i>AP3D1-JSRP1</i>   |
| chr19 | 12676128             | chr19 | 13368794             | PE      | L          | Intra | Yes   | Yes   | <i>-CACNA1A</i>      |
| chr19 | 18021099             | chr19 | 19035828             | PE      | L          | Intra | Yes   | Yes   | <i>-DDX49</i>        |
| chr19 | 18229064             | chr19 | 18256841             | PE      | S-L        | Intra | Yes   | Yes   | <i>MAST3</i>         |
| chr22 | 46580000<br>46590000 | chr19 | 33277912<br>33287912 | MP      | H          | Inter | Yes   | Yes   | <i>PPARA-TDRD12</i>  |
| chrX  | 79669626             | chrX  | 79825980             | PE      | S-L        | Intra |       |       | <i>FAM46D-</i>       |

Chr 1, Chr 2: the 2 rearranged chromosomes, CNA 1, CNA 2: copy number alteration detected in both breakpoints, Inter: interchromosomal rearrangement, Intra: intrachromosomal rearrangement, MP: mate-pair whole-genome sequencing, PE: paired-end whole-genome sequencing.

In the last column the presence of “ - ” denotes position 1 or position 2 of the affected gene.

\*The abbreviations S, L indicate "Smufin and Lumpy", respectively, used for SV in the WGS analysis; whereas H indicates "in-house script" used for SV in the MP-WGS analysis.

**Supplemental Table S8. Protein-coding mutations of cyclin D1<sup>+</sup> and cyclin D2<sup>-</sup> MCL case ID73 (hg19).**

| Chr   | Position  | Ref | Obs | Type        | Gene            | Codon     | Protein      | VAF (%) | Predict. | Sanger* |
|-------|-----------|-----|-----|-------------|-----------------|-----------|--------------|---------|----------|---------|
| chr1  | 156105059 | C   | T   | missense    | <i>LMNA</i>     | c.892C>T  | p.Arg298Cys  | 39.4    | D/D/D    |         |
| chr1  | 248185661 | A   | T   | stop gained | <i>OR2L5</i>    | c.412A>T  | p.Arg138     | 39.5    | B./D     |         |
| chr3  | 73433538  | G   | A   | missense    | <i>PDZRN3</i>   | c.2179C>T | p.Arg727Cys  | 41.7    | D/D/D    |         |
| chr4  | 94377059  | G   | A   | missense    | <i>GRID2</i>    | c.1792G>A | p.Gly598Arg  | 38.6    | B/D/D    |         |
| chr5  | 133496711 | T   | G   | missense    | <i>SKP1</i>     | c.282A>C  | p.Lys94Asn   | 28.6    | B/D/D    |         |
| chr6  | 44147780  | A   | T   | missense    | <i>CAPN11</i>   | c.1520A>T | p.Glu507Val  | 38.1    | D/D/D    |         |
| chr6  | 128306918 | G   | A   | stop gained | <i>PTPRK</i>    | c.3217C>T | p.Arg1073*   | 36.4    | B./D     |         |
| chr7  | 100085885 | C   | T   | missense    | <i>NYAP1</i>    | c.541C>T  | p.Pro181Ser  | 33.3    | B/B/B    |         |
| chr7  | 122757622 | G   | A   | missense    | <i>SLC13A1</i>  | c.1553C>T | p.Pro518Leu  | 28.6    | D/D/D    |         |
| chr8  | 77618608  | A   | T   | missense    | <i>ZFHX4</i>    | c.2285A>T | p.Lys762Ile  | 47.6    | D/D/D    |         |
| chr8  | 103845398 | A   | G   | missense    | <i>AZIN1</i>    | c.790T>C  | p.Ser264Pro  | 16.1    | D/B/D    | Yes     |
| chr8  | 110509210 | T   | A   | missense    | <i>PKHD1L1</i>  | c.10390T  | p.Tyr3464Asp | 17      | D/D/D    | Yes     |
| chr8  | 110509217 | A   | C   | missense    | <i>PKHD1L1</i>  | c.10397A  | p.Asn3466Thr | 17.5    | B/D/D    | Yes     |
| chr9  | 7174671   | C   | T   | missense    | <i>KDM4C</i>    | c.2174C>T | p.Pro1038Leu | 20.0    | D/D/D    |         |
| chr9  | 12694226  | C   | T   | missense    | <i>TYRP1</i>    | c.230C>T  | p.Pro77Leu   | 32.3    | B/B/D    |         |
| chr10 | 123274833 | G   | A   | missense    | <i>FGFR2</i>    | c.1088C>T | p.Ala363Val  | 40.7    | B/B/D    |         |
| chr11 | 17627673  | C   | T   | missense    | <i>OTOG</i>     | c.3964C>T | p.Arg1395Cys | 42.4    | D/D/D    |         |
| chr11 | 18369431  | G   | A   | missense    | <i>GTF2H1</i>   | c.82G>A   | p.Gly340Arg  | 25.6    | B/B/D    |         |
| chr11 | 31327808  | C   | A   | missense    | <i>DCDC1</i>    | c.562G>T  | p.Ala188Ser  | 32.6    | B/D/B    |         |
| chr11 | 70544862  | C   | T   | missense    | <i>SHANK2</i>   | c.677G>A  | p.Arg227His  | 25.9    | D/D/D    | Yes     |
| chr12 | 7647946   | C   | A   | missense    | <i>CD163</i>    | c.1151G>T | p.Gly384Val  | 23.5    | D/D/D    | Yes     |
| chr14 | 23842422  | C   | T   | missense    | <i>IL25</i>     | c.95C>T   | p.Thr32Ile   | 30.8    | D/B/B    |         |
| chr15 | 71188227  | G   | C   | missense    | <i>LRRC49</i>   | c.145G>C  | p.Gly49Arg   | 40.0    | B/D/D    |         |
| chr15 | 75015000  | T   | C   | missense    | <i>CYP1A1</i>   | c.439A>G  | p.Ile147Val  | 37.5    | B/B/B    |         |
| chr15 | 79750279  | G   | A   | missense    | <i>KIAA1024</i> | c.1790G>A | p.Cys597Tyr  | 40.0    | ./D/D    |         |
| chr16 | 71683304  | G   | A   | missense    | <i>PHLPP2</i>   | c.3461C>T | p.Pro1154Leu | 31.8    | D/D/D    |         |
| chr17 | 57758724  | A   | T   | missense    | <i>CLTC</i>     | c.3134A>T | p.Asn1045Ile | 45.9    | D/D/D    |         |
| chr20 | 30436646  | G   | A   | missense    | <i>DUSP15</i>   | c.689C>T  | p.Pro230Leu  | 34.4    | D/D/B    | Yes     |
| chr20 | 60903462  | C   | T   | missense    | <i>LAMA5</i>    | c.4487G>A | p.Gly1496Asp | 24.0    | D/D/D    |         |
| chrX  | 66937326  | G   | A   | missense    | <i>AR</i>       | c.584G>A  | p.Arg727His  | 38.2    | D/D/D    |         |
| chrX  | 69456990  | A   | C   | missense    | <i>AWAT1</i>    | c.352A>C  | p.Thr118Pro  | 22.2    | D/D/D    | Yes     |

Chr: chromosome, Obs: observed, Ref: reference, SNV: single nucleotide variants, VAF: variant allele frequency.

The functional predictors (Predict.) used are SIFT/Polyphen2/MutationTaster and the functional effects are categorized as D: Damaging, B: Benign, .: NA.

\*The selected 7 mutations (in 6 genes) detected by Sidrón and Mutect2 and not by Smufin were verified by Sanger sequencing.

**Supplemental Table S9. Copy number alterations of 42 cyclin D1<sup>+</sup> MCL cases (47 samples) (hg19)(in excel format).**

**SUPPLEMENTAL FIGURES**

**Supplemental Figure S1. Schematic representation of the experimental design and cyclin D1<sup>+</sup> MCL subgroups.**

Flowchart diagram of cases, techniques, and results. The gray square highlights cases analyzed by NGS that lead to the discovery of the cryptic rearrangements. \*In 1/9 cases with *CCND2* break no IGH, IGK, IGL FISH was performed to test the partner.

BAP: break-apart probes, IG FISH: FISH experiments to determine the partner gene, MP-WGS: mate-pair whole-genome sequencing, WES: whole-exome sequencing, ↑↑: overexpression.

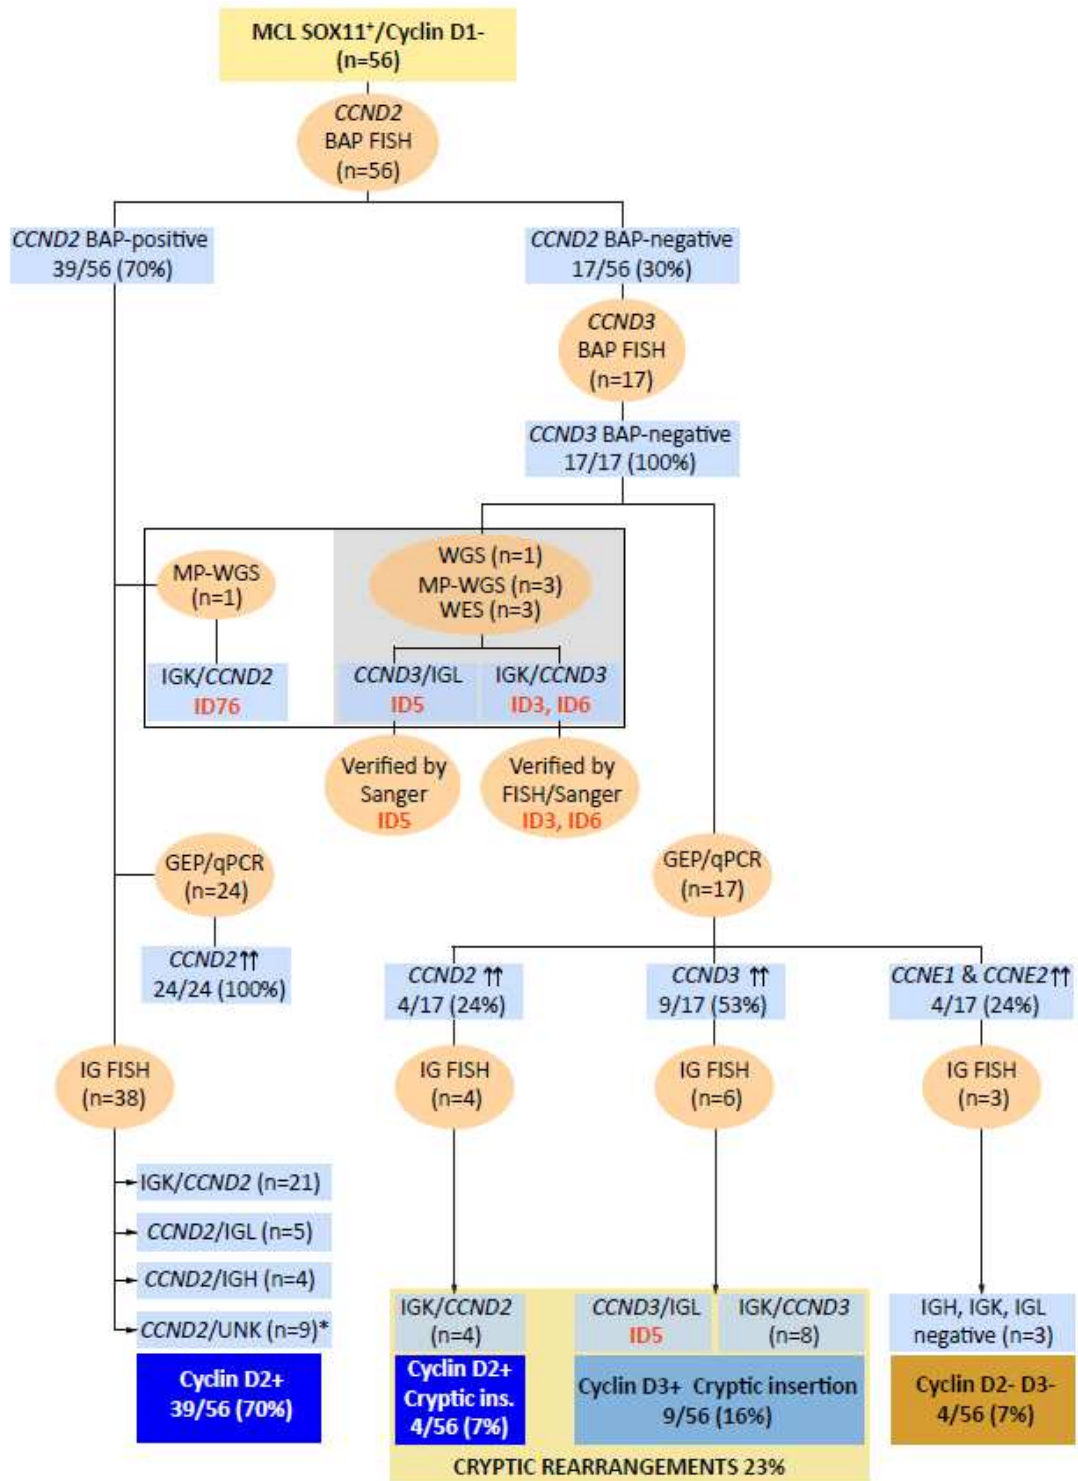

**Supplemental Figure S2. FISH analyses of *CCND2/D3* cryptic insertions.** (A) Cryptic *IGK/CCND3* in case ID87, 2 or 3 fusion signals were found in each cell, concordant with a gain of *CCND3*, both by FISH and array. (B-C) Cryptic *IGK/CCND2* in cases ID12b and ID56. Fusion probes *IGK-enh/CCND3* and *IGK-enh/CCND2* were used, with *CCND3* and *CCND2* labeled in red and *IGK-enh* in green. Two red and two green signals are detected in normal cells, and yellow arrows highlight the insertion (one red and one small green signals juxtaposed). Magnification of cells with the rearrangement at the right side of each picture (enh: enhancer).

**A ID87 *IGK-enh/CCND3***

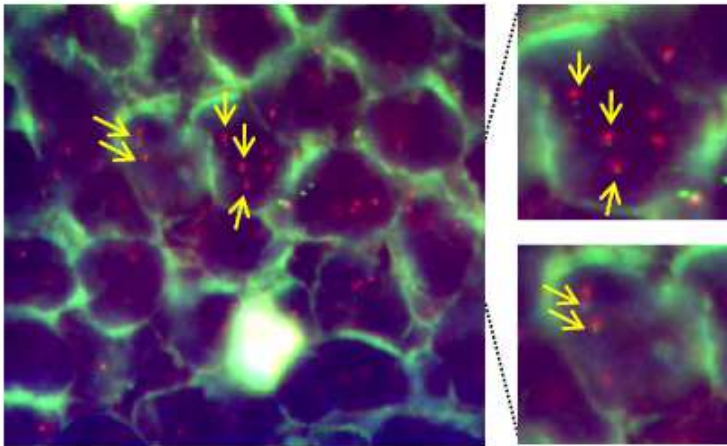

**B ID12b *IGK-enh/CCND2***

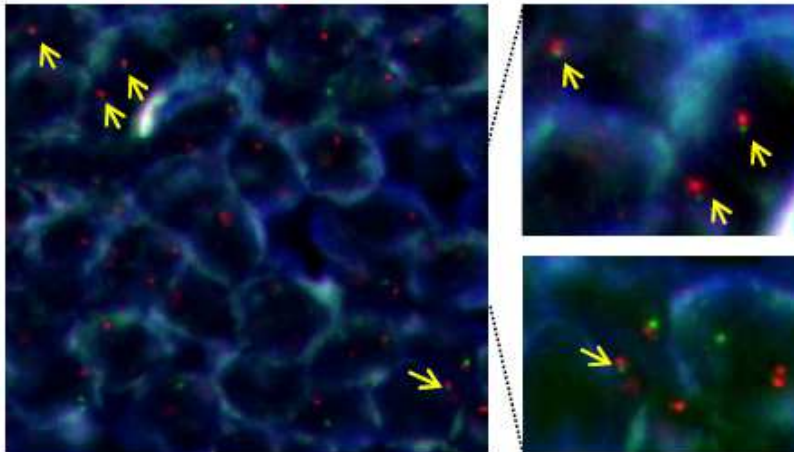

**C ID56 *IGK-enh/CCND2***

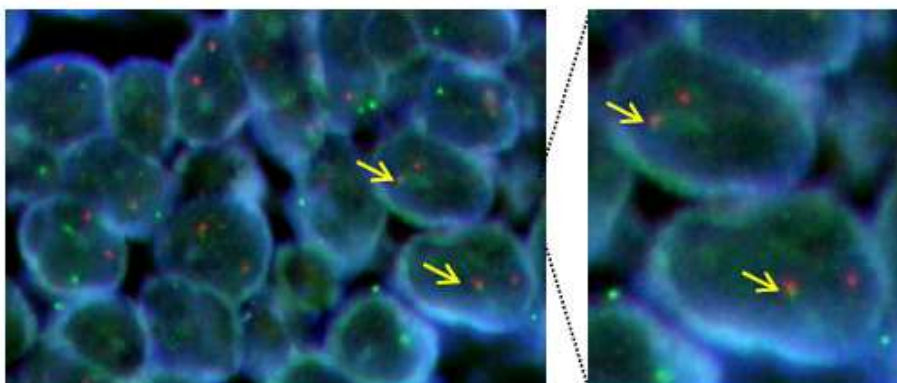



**Supplemental Figure S3. *CCNE1* and *CCNE2* expression in cyclin D1<sup>-</sup> MCL, blastoid cyclin D1<sup>+</sup> MCL, DLBCL, and SMZL. (\*SMZL1 corresponds to the case with high protein expression).**

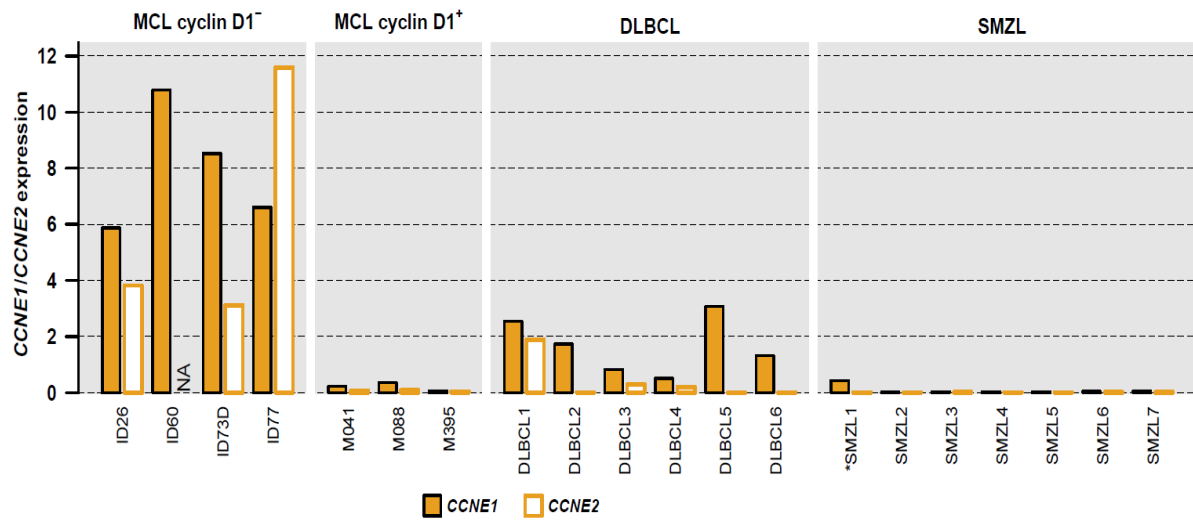

**Supplemental Figure S4. Gene expression profiling analysis in cyclin D1<sup>-</sup> MCL. (A)** Heatmap representation comparing cyclin D1<sup>-</sup> (cyclin D2<sup>+</sup>, cyclin D3<sup>+</sup>, or cyclin E<sup>+</sup>) and conventional cyclin D1<sup>+</sup> MCL cases using GeneChip Human Genome U133 Plus 2.0 Arrays. Each column represents one case and each row one gene. The samples were randomly distributed along the generated clusters. **(B)** By principal component analysis (PCA) no differences were observed between cyclin D1<sup>-</sup> and cyclin D1<sup>+</sup> MCL cases. **(C)** Differentially expressed genes between cyclin D1<sup>+</sup> MCL and cyclin D1<sup>-</sup> MCL.

**A**

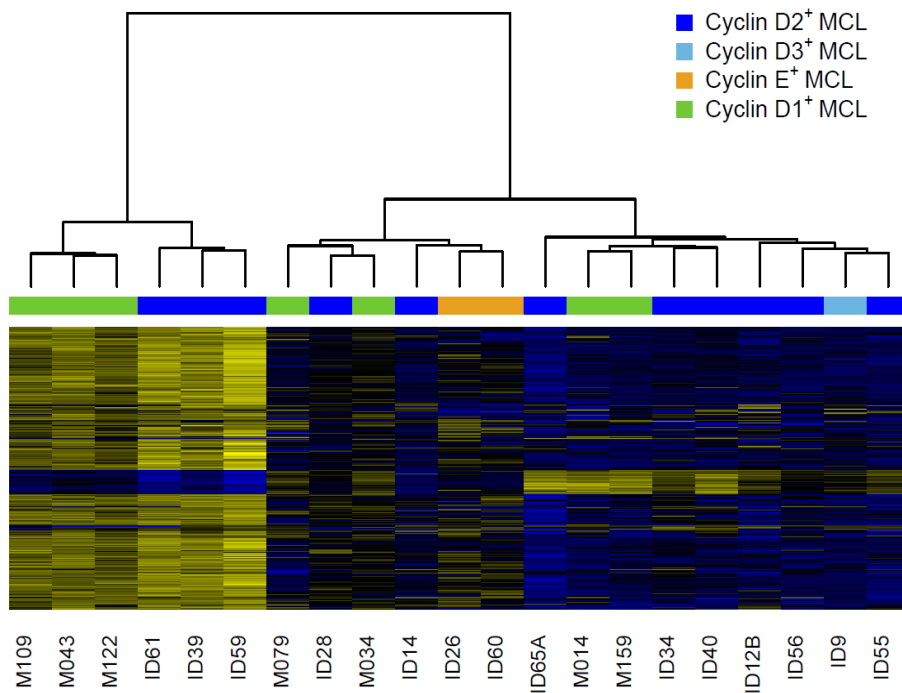

**B**

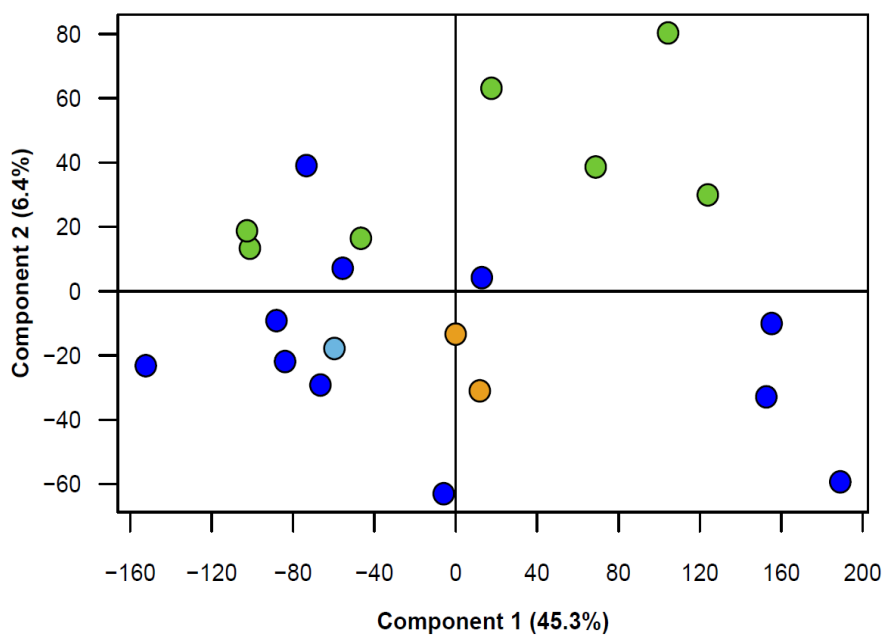

C

**Genes differentially expressed between cyclin D1<sup>+</sup> MCL versus cyclin D1<sup>-</sup> MCL.**

| Probe                 | Gene            | Order | log(FC) | t      | P-value | Adjusted P-value |
|-----------------------|-----------------|-------|---------|--------|---------|------------------|
| <b>Top 20 genes</b>   |                 |       |         |        |         |                  |
| 208711_s_at           | <i>CCND1</i>    | 1     | 4.363   | 15.112 | <0.001  | <0.001           |
| 222131_x_at           | <i>RHOT2</i>    | 2     | 0.690   | 5.200  | <0.001  | 0.244            |
| 214498_at             | <i>ASIP</i>     | 3     | 0.602   | 5.152  | <0.001  | 0.244            |
| 238097_at             | <i>GAS6-AS1</i> | 4     | 0.997   | 4.592  | <0.001  | 0.715            |
| 211358_s_at           | <i>CIZ1</i>     | 5     | 0.435   | 4.371  | <0.001  | 0.801            |
| 220080_at             | <i>FBXL8</i>    | 6     | 0.638   | 4.241  | <0.001  | 0.801            |
| 227587_at             | <i>KRI1</i>     | 7     | 0.680   | 4.232  | <0.001  | 0.801            |
| 230664_at             | <i>H2BFXP</i>   | 8     | -0.922  | -4.212 | <0.001  | 0.801            |
| 221679_s_at           | <i>ABHD6</i>    | 9     | -0.960  | -4.152 | <0.001  | 0.801            |
| 225224_at             | <i>NOL4L</i>    | 10    | -0.712  | -4.151 | <0.001  | 0.801            |
| 213660_s_at           | <i>TOP3B</i>    | 11    | 0.585   | 4.086  | <0.001  | 0.801            |
| 226689_at             | <i>CISD2</i>    | 12    | -0.601  | -4.065 | <0.001  | 0.801            |
| 208461_at             | <i>HIC1</i>     | 13    | 0.798   | 4.053  | <0.001  | 0.801            |
| 218227_at             | <i>NUBP2</i>    | 14    | 0.496   | 3.970  | <0.001  | 0.801            |
| 228263_at             | <i>GRASP</i>    | 15    | 0.480   | 3.969  | <0.001  | 0.801            |
| 1552632_a_at          | <i>ARSG</i>     | 16    | -0.659  | -3.947 | <0.001  | 0.801            |
| 230633_at             | <i>TMEM102</i>  | 17    | 0.461   | 3.928  | <0.001  | 0.801            |
| 221704_s_at           | <i>VPS37B</i>   | 18    | 0.876   | 3.917  | <0.001  | 0.801            |
| 221992_at             | <i>NP1PB15</i>  | 19    | 0.673   | 3.881  | <0.001  | 0.801            |
| 218909_at             | <i>RPS6KC1</i>  | 20    | -0.645  | -3.833 | <0.001  | 0.801            |
| <b>Selected genes</b> |                 |       |         |        |         |                  |
| 200951_s_at           | <i>CCND2</i>    | 32    | -2.541  | -3.662 | 0.001   | 0.787            |
| 204914_s_at           | <i>SOX11</i>    | 3486  | -0.626  | -1.378 | 0.182   | 0.999            |
| 211814_s_at           | <i>CCNE2</i>    | 11919 | -0.220  | -0.537 | 0.597   | 0.999            |
| 201700_at             | <i>CCND3</i>    | 16302 | 0.113   | 0.243  | 0.810   | 0.999            |
| 213523_at             | <i>CCNE1</i>    | 17607 | -0.024  | -0.163 | 0.872   | 0.999            |

FC, fold-change.

**Supplemental Figure S5. Copy number alterations in cyclin D1<sup>-</sup> MCL.** Chromosomes are depicted on the X-axes and the frequency of altered cases is depicted on Y-axes; gains and losses are represented in the upper and lower parts, respectively. **(A)** Comparison of copy number alterations (CNA) between cyclin D1<sup>-</sup> and cyclin D1<sup>+</sup> MCL. **(B)** Comparison of CNA between cyclin D2<sup>+</sup> and cyclin D3<sup>+</sup> MCL. **(C)** Representation of CNA in 5 cases with 2 different samples (1 synchronous and 4 sequential). Chromosomes are depicted in columns and each row represents one sample. For each pair of samples the time interval is indicated in months and the asterisks highlight the post-treatment samples.

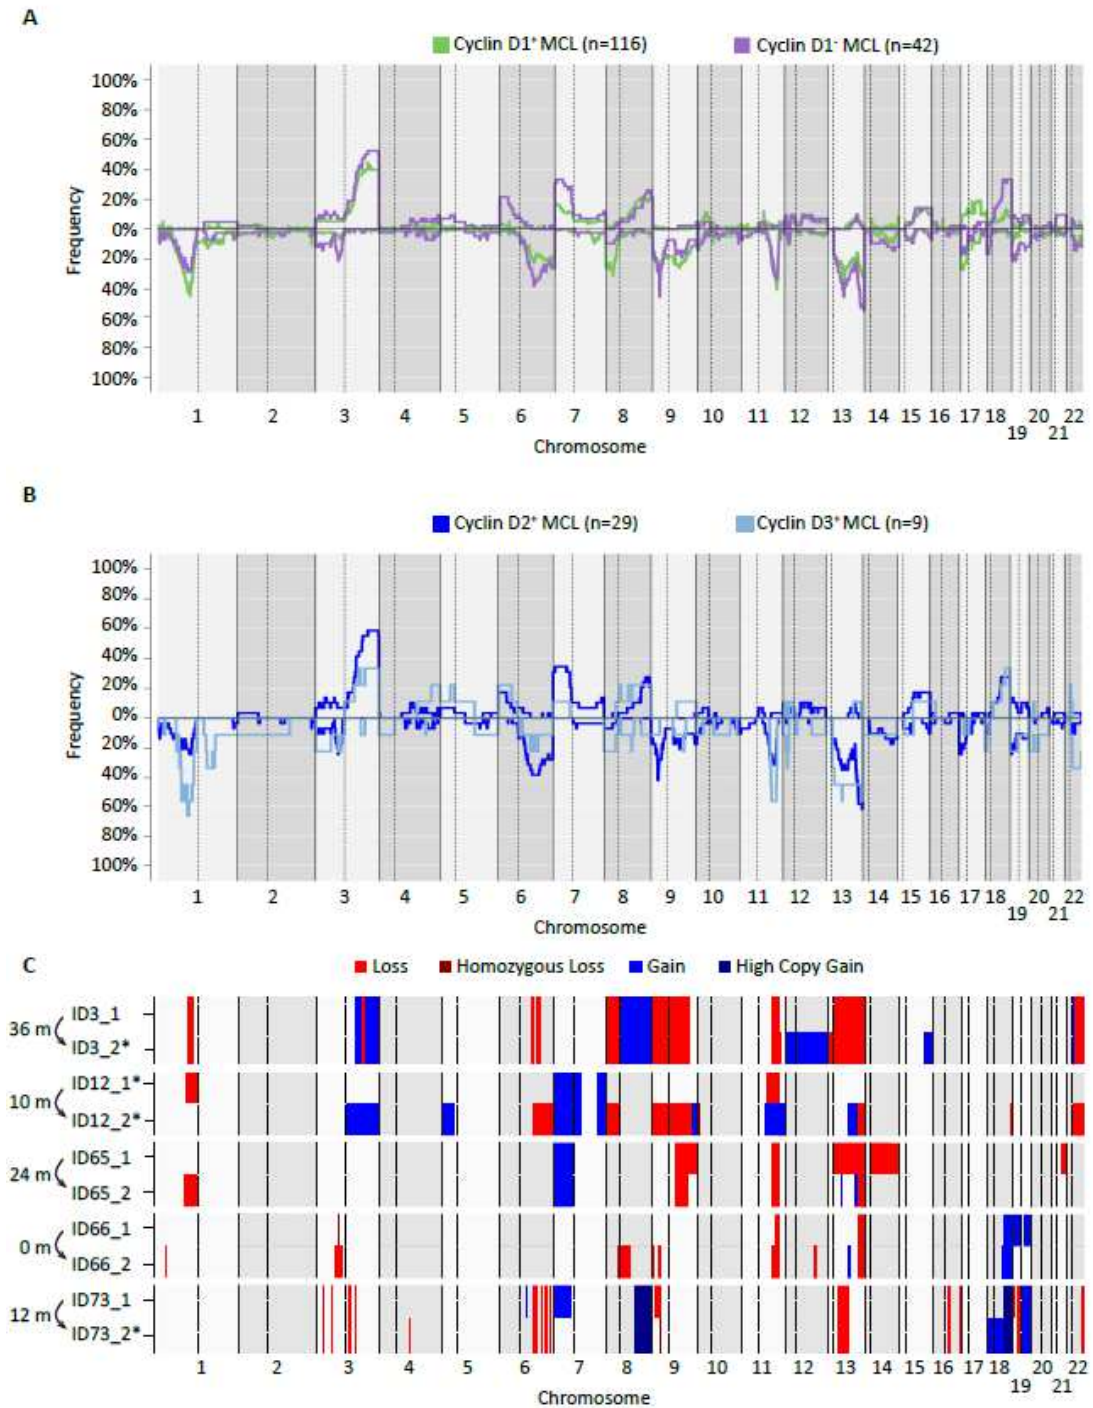

**Supplemental Figure S6. Clinical outcome of cyclin D1<sup>-</sup> MCL patients.** (A) Kaplan-Meier curve showing the similar overall survival (OS) of cyclin D1<sup>+</sup>/SOX11<sup>+</sup> MCL and cyclin D1<sup>-</sup> MCL patients. (B) Kaplan-Meier curve comparing the OS of cyclin D2<sup>+</sup> MCL, cyclin D3<sup>+</sup> MCL, and cyclin E1<sup>+</sup>/E2<sup>+</sup> MCL patients. The *P*-value was calculated using a Log-rank test.

**A**

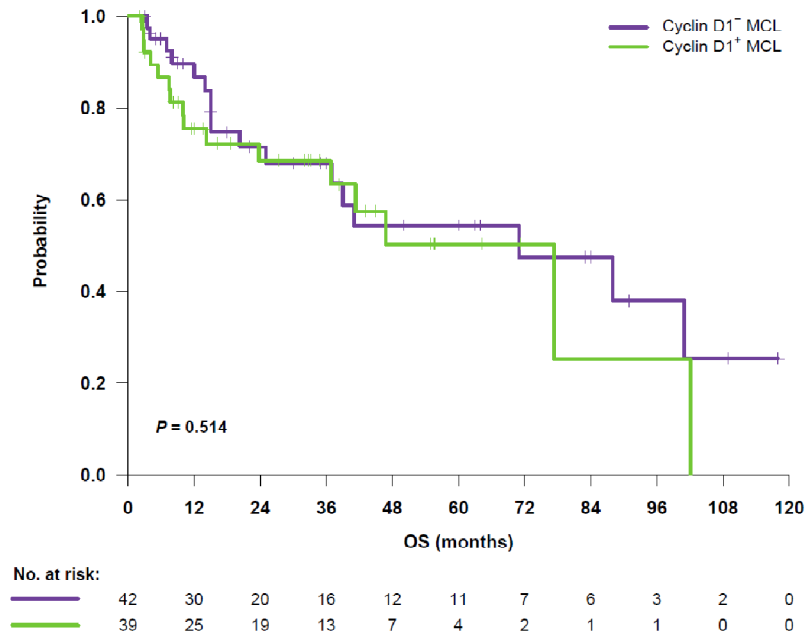

**B**

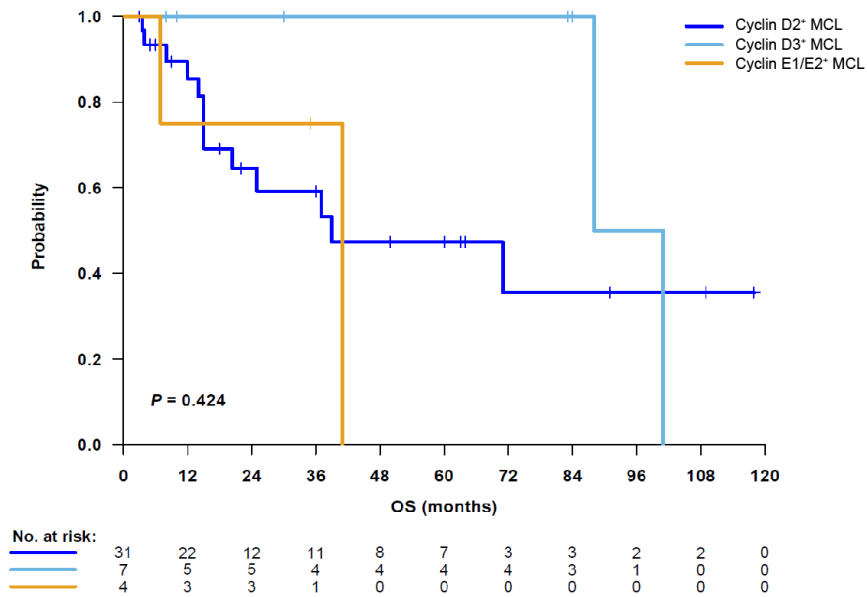

## SUPPLEMENTAL REFERENCES

1. Salaverria I, Royo C, Carvajal-Cuenca A et al. CCND2 rearrangements are the most frequent genetic events in cyclin D1(-) mantle cell lymphoma. *Blood* 2013;121:1394-1402.
2. Gesk S, Klapper W, Martin-Subero JI et al. A chromosomal translocation in cyclin D1-negative/cyclin D2-positive mantle cell lymphoma fuses the CCND2 gene to the IGK locus. *Blood* 2006;108:1109-1110.
3. Sonoki T, Harder L, Horsman DE et al. Cyclin D3 is a target gene of t(6;14)(p21.1;q32.3) of mature B-cell malignancies. *Blood* 2001;98:2837-2844.
